# Supplementary material for: Embedding an extraordinary amount of gemifloxacin antibiotic in ZIF-8 framework with one-step synthesis and measurement of its H2O2-sensitive release and potency against infectious bacteria
Source: Royal Society of Chemistry journal article supplement (doi:10.1039/d2nj02981b), 2022-01-01
Supplement: d2nj02981b1.pdf [file d2nj02981b1.pdf]

**Supplementary information**

**Embedding an Extraordinary value of Gemifloxacin Antibiotics in ZIF-8 Framework with  
One-step Synthesis and Measurement of Its H<sub>2</sub>O<sub>2</sub>-Sensitive Release and Potency against  
Infectious Bacteria**

Sajjad Soltani, Kamran Akhbari\*

School of Chemistry, College of Science, University of Tehran, Tehran, Iran.

P.O. Box 14155-6455; Tel.: +98 21 61113734; fax: +98 21 66495291

E-mail address: akhbari.k@ut.ac.ir

### **Synthesis of ZIF-8**

The solution of  $\text{Zn}(\text{NO}_3)_2 \cdot 6\text{H}_2\text{O}$  (0.20g in 5mL  $\text{H}_2\text{O}$ ) was added to the solution of the 2-methylimidazole (0.332g in 12mL  $\text{H}_2\text{O}$  + 0.3 mL TEA). After stirring the solution for 90 s, the precipitate remained motionless for 40 min. product was filtrated and washed three time with 10 mL distilled water and dried overnight in a vacuum oven.

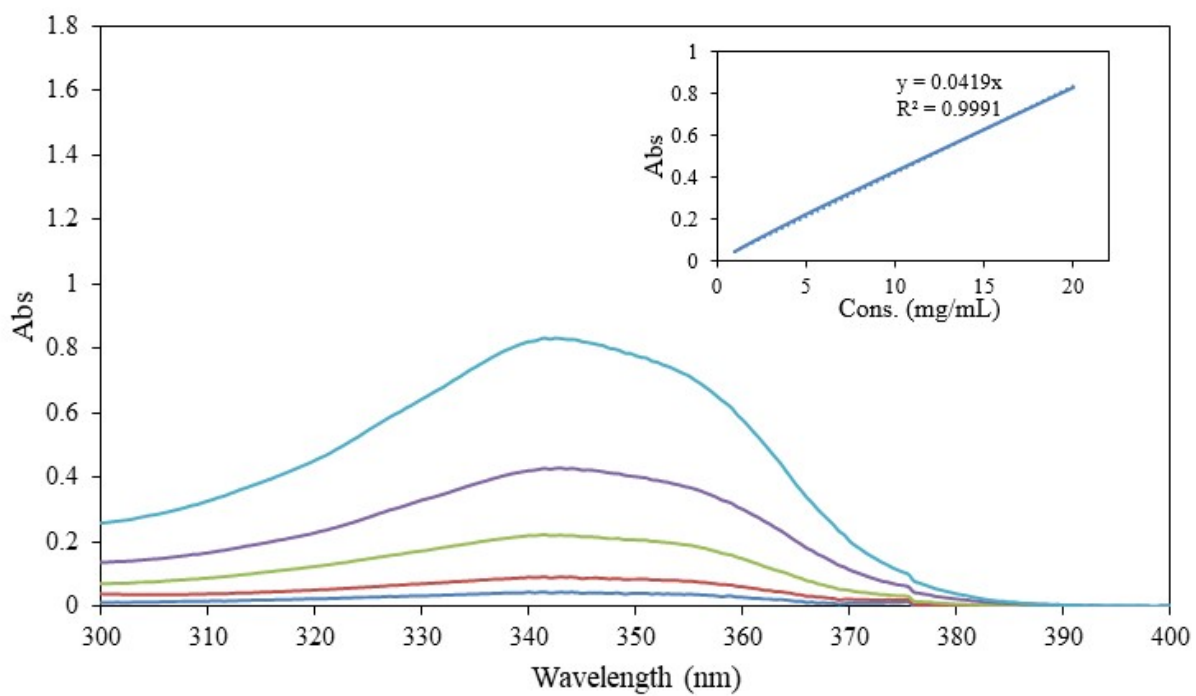

Figure S1. Calibration plot of gemifloxacin (GEM).

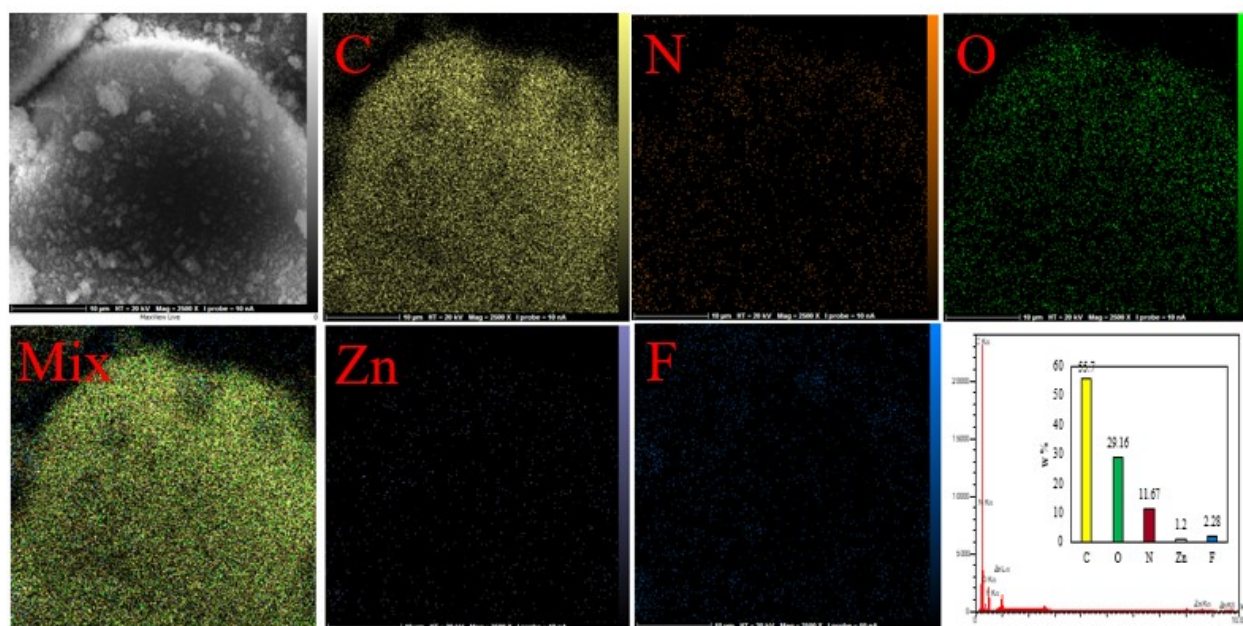

Figure S2. EDAX analysis of GEM@ZIF.

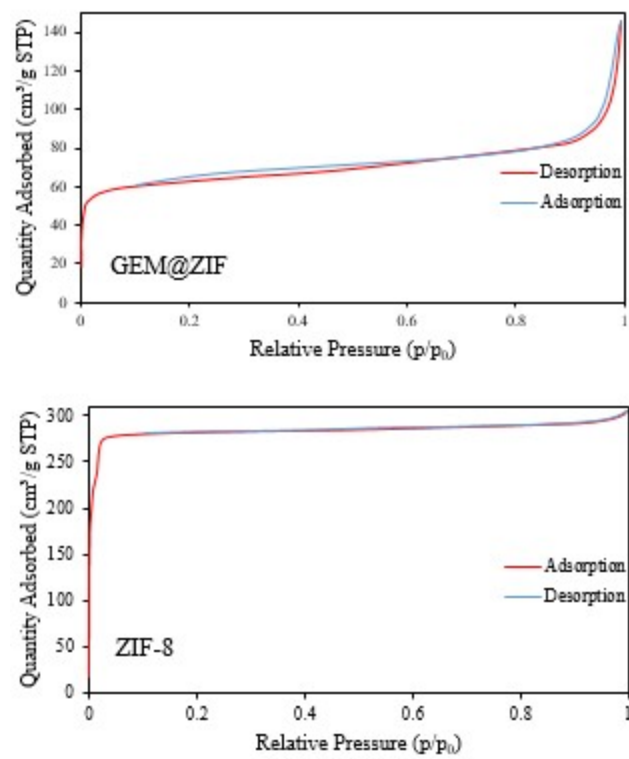

Figure S3. Nitrogen adsorption and desorption isotherms of GEM@ZIF and ZIF-8.

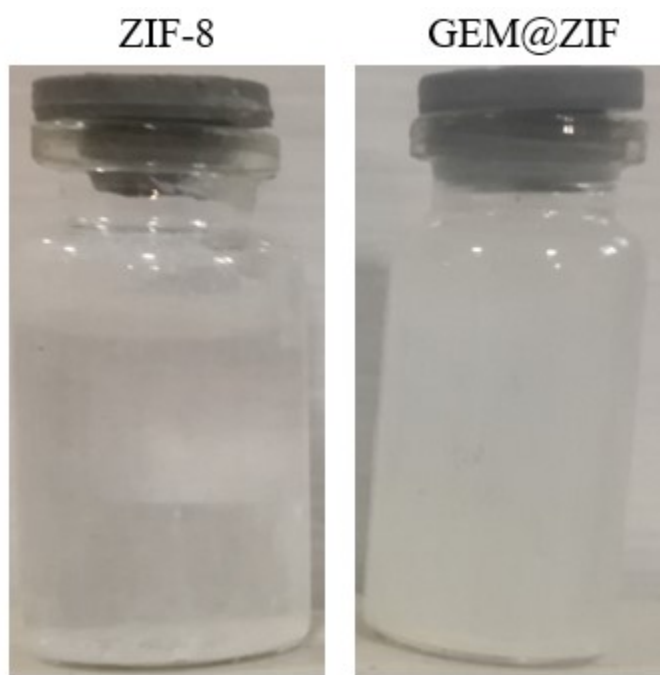

Figure S4. Comparison of dispersion of GEM@ZIF and ZIF-8.
